# Supplementary material for: One-pot synthesis of fluorescent and cross-linked polyphosphazene nanoparticles for highly sensitive and selective detection of dopamine in body fluids
Source: Royal Society of Chemistry journal article supplement (doi:10.1039/c5ra20462c), 2015-01-01
Supplement: c5ra20462c1.pdf [file c5ra20462c1.pdf]

Supporting Information for

# One-pot Synthesis of Fluorescent and Cross-linked Polyphosphazene Nanoparticles for Highly Sensitive and Selective Detection of Dopamine in Body Fluids

Daquan Wang,<sup>a</sup> Ying Hu,<sup>b</sup> Lingjie Meng,<sup>\*a</sup> Xiaochi Wang,<sup>a</sup> and Qinghua Lu<sup>\*b</sup>

<sup>a</sup> School of Science; State Key Laboratory for Mechanical Behavior of Materials, Xi'an Jiao Tong University, Xi'an, 710049, P.R. China. Email: menglingjie@mail.xjtu.edu.cn

<sup>b</sup> School of Chemistry and Chemical Technology; State Key Laboratory of Metal Matrix Composites, Shanghai Jiao Tong University, Shanghai, 200240, P. R. China. Email: qhlu@sjtu.edu.cn

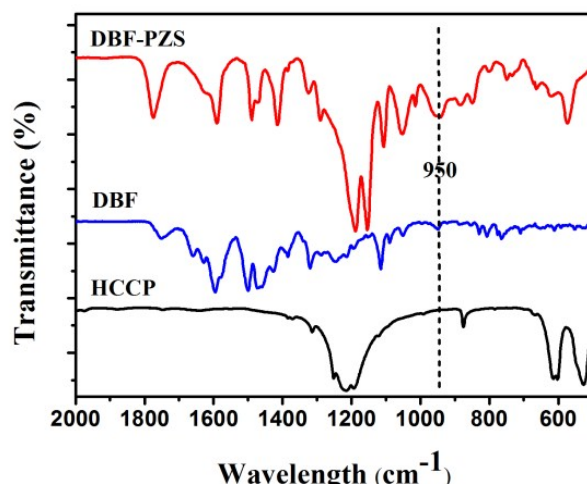

Figure S1. FTIR spectra of DBF-PZS, DBF, HCCP.

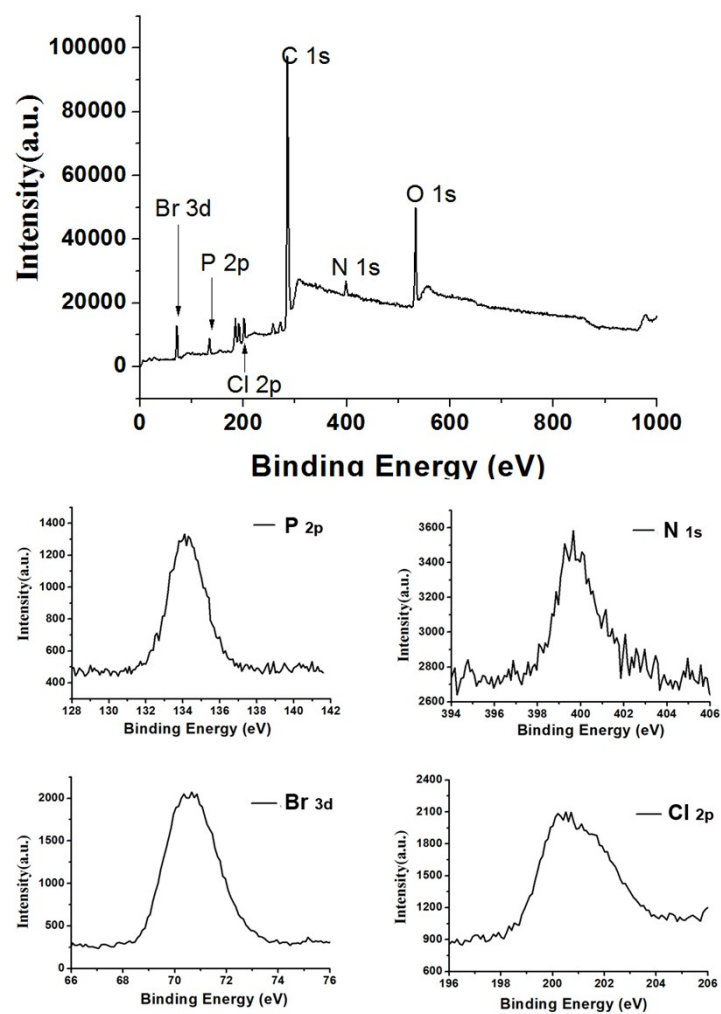

Figure S2. XPS spectrum of DBF-PZS nanoparticles, and high-resolution P 2p, N 1s, Br 3d, and Cl 2p XPS spectra.

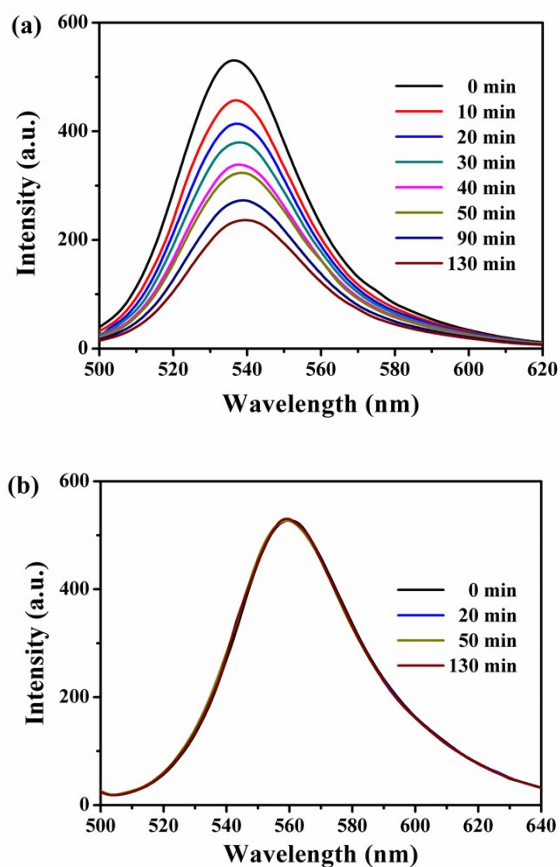

Figure S3. Fluorescence spectra of (a) DBF and (b) DBF-PZS under different irradiation time at 365 nm (2 W).

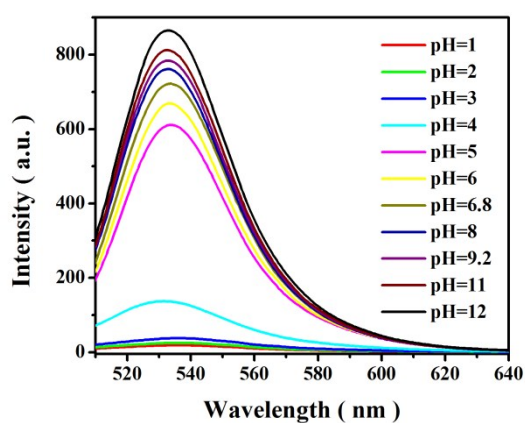

Figure S4. Fluorescence spectra of DBF water solution (0.2 μM) in the presence of different pH values (1 – 12).

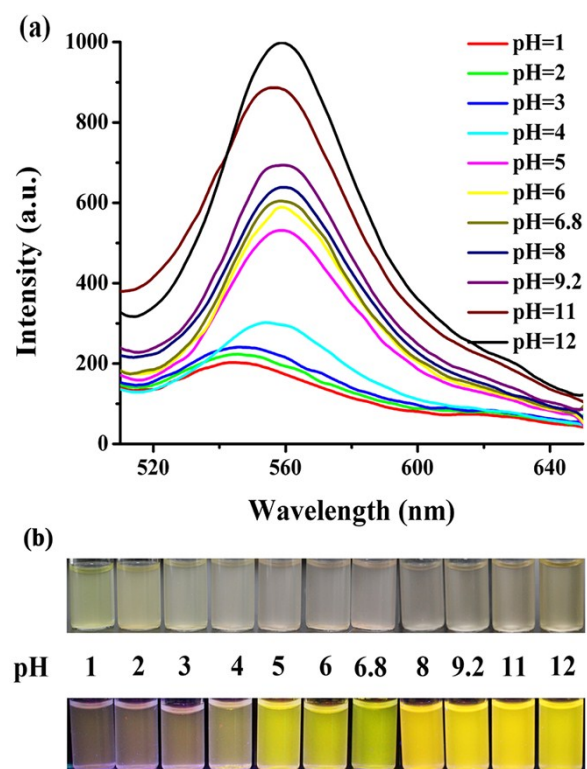

Figure S5. (a) Fluorescence spectra of DBF-PZS (suspension in water,  $300 \mu\text{g}\cdot\text{mL}^{-1}$ ) in the presence of different pH values (1 – 12); (b) the optical photograph (up) and fluorescence images (down) under 365 nm UV irradiation in DBF-PZS water suspension.
